# Supplementary material for: Mutant selection in the self-incompatible plant radish (Raphanus sativus L. var. sativus) using two-step TILLING
Source: PubMed Central journal article supplement — Breed Sci. 2017 May 31;67(3):268–76. doi: 10.1270/jsbbs.16200 (PMC5515317; doi:10.1270/jsbbs.16200), 2017-05-31
Supplement: 67_16200_2.pdf [file 67_16200_2.pdf]

**Supplemental Table 1.**  
**Identification of *RsRBCS* genes**

| Genome source       | Contig         | Blast hit region | Direction | Sequence of forward primer (5'-3') <sup>a</sup><br>Sequence of reverse primer (5'-3') | PCR amplification <sup>b</sup> | Functional / Pseudo | Gene Name       | TILLING Length (bp) |
|---------------------|----------------|------------------|-----------|---------------------------------------------------------------------------------------|--------------------------------|---------------------|-----------------|---------------------|
| Kazusa <sup>c</sup> | Rsa1.0_00756.1 | 56975-57776      | +         | GGACCTTTTGTTCACTAGGGCTTTTGGC<br>GCAGGAACAGTGCAATTCCTGTTTTGAG                          | +                              | Functional          | <i>RsRBCS1A</i> | 1224                |
| Kazusa              | Rsa1.0_01047.1 | 7699-8498        | +         | CCACGTGGCATTATTTTAGTGGTTAAAACCGATA<br>GGATAAAGTTTTGTTGTTTACACAAAGCAATGAAGCTG          | +                              | Functional          | <i>RsRBCS2B</i> | 1105                |
| Kazusa              | Rsa1.0_01369.1 | 9382-8570        | -         | GTGGTCAAGTATCGATAAGGGTATCAACACCG<br>TGAATGTTTTCTTATCCCAATAAATTGAGAACCCTAATAGC         | +                              | Functional          | <i>RsRBCS3A</i> | 1180                |
| Kazusa              | Rsa1.0_01446.1 | 39634-40486      | +         | AAAAGCCCAATCTAAGTTTCAATTTGGGCC<br>CCATCATAGATTTTTCAGTGGTCCATCTTTTACTTC                | +                              | Pseudo              | <i>RsRBCS1B</i> | -                   |
| Kazusa              | Rsa1.0_04010.1 | 1683-1050        | -         | GTGGCAGGTAACGACGTTATCATCAGCC<br>TATGTCCATAAATCAGACATTGACAATCGG                        | -                              | -                   | -               | -                   |
| Kazusa              | Rsa1.0_06054.1 | 10467-11271      | +         | CCTTTGATCATTAGGGATTATACCTCTTGCGG<br>CCCATCGCGTTACCTATTCCGTTTTGTAA                     | +                              | Functional          | <i>RsRBCS4A</i> | 1172                |
| Kazusa              | Rsa1.0_06054.1 | 794-1589         | +         | GGAGGCCAGCAGTAAATCAGTAAGTCAGTAACCA<br>TGAAAACCTAATAGCCATCAGAAAGTAACCAAGACG            | +                              | Functional          | <i>RsRBCS5A</i> | 1166                |
| MSU <sup>d</sup>    | RrC23820       | 1288-487         | -         | CGCACTCTTTGATCATTAGGGCTTTATGCC<br>CGAAAAATAACCAAGAAAAAGAAGCGATGCAG                    | +                              | Functional          | <i>RsRBCS2A</i> | 1082                |
| MSU                 | RrC6617        | 8265-7495        | -         | ATCACAGTGGCCTGTATTGATAAGGGTGCC<br>CGATAGAAAATGTCTCTGAAACGTAAACCC                      | -                              | -                   | -               | -                   |
| MSU                 | RrC9110        | 1285-2093        | +         | ATTAGGGATTATACCTCTTGCGGTTCTCAC<br>GTTCTAACGAATATGGCTATTTCATTAG                        | -                              | -                   | -               | -                   |

<sup>a</sup> The primer sequences were used for both of gene identification and TILLING. <sup>b</sup> "+" indicates that the region was amplified by PCR, "-" was not. <sup>c</sup> Kazusa (Kazusa DNA Research Institute; <http://radish.kazusa.or.jp/>). <sup>d</sup> MSU (Michigan State University; <http://radish.plantbiology.msu.edu>).

**Supplemental Table 2.****Putative chromosome positioning in seven *RBCS*s in Radish**

| Gene ID         | Similar gene in <i>B. rapa</i> | Homology (%) | Chromosome ( <i>B. rapa</i> ) | Putative Chromosome Position in <i>R. sativus</i> |
|-----------------|--------------------------------|--------------|-------------------------------|---------------------------------------------------|
| <i>RsRBCS1A</i> | LOC103850112                   | 85           | A02                           | LG1 /LG4                                          |
| <i>RsRBCS2A</i> | LOC103864160                   | 93           | A04                           | LG3                                               |
| <i>RsRBCS4A</i> | LOC103863779                   | 92           | A04                           | LG3                                               |
| <i>RsRBCS5A</i> | LOC103863779                   | 92           | A04                           | LG3                                               |
| <i>RsRBCS3A</i> | LOC103863779                   | 88           | A04                           | LG3                                               |
| <i>RsRBCS2B</i> | LOC103852369                   | 90           | A02                           | LG1/LG4                                           |
|                 | LOC103852368                   | 90           | A02                           | LG1/LG4                                           |
| <i>RsRBCS1B</i> | LOC103852372                   | 87           | A02                           | LG1 /LG4                                          |

**Supplemental Table 3.**  
**Mutations and amino acid substitutions of *RBCS***  
**genes in the Radish mutant population**

| <b>Gene ID</b>  | <b>Position<br/>from ATG</b> | <b>Amino acid<br/>change</b> | <b>Concentration<br/>of EMS (%)</b> |
|-----------------|------------------------------|------------------------------|-------------------------------------|
| <i>RsRBCS2A</i> | G310A                        | G104R                        | 0.25                                |
| <i>RsRBCS5A</i> | C-83T                        | -                            | 0.25                                |
| <i>RsRBCS5A</i> | G-9A                         | -                            | 0.25                                |
| <i>RsRBCS2B</i> | C11T                         | S4F                          | 0.50                                |
| <i>RsRBCS2B</i> | C134T                        | S45F                         | 0.50                                |
| <i>RsRBCS2B</i> | G352A                        | D118N                        | 0.50                                |
